# Supplementary material for: Impact of recommissioning flushing on Legionella pneumophila in a large building during the COVID-19 pandemic
Source: Frontiers journal article supplement (doi:10.3389/frwa.2022.959689), 2022-10-13
Supplement: Table_1.DOCX [file Table_1.DOCX]

**Supplemental Tables**

Table S. Summary of statistical results of microbiological measurements. Note: results are presented as mean value (min value – max value).

| **Parameter** | **16-week building closure** | | **24 h after recommissioning** | | **4-week after recommissioning** | |
| --- | --- | --- | --- | --- | --- | --- |
| First draw | 5-min flush | First draw | 5-min flush | First draw | 5-min flush |
| Bacterial ATP  (pg ATP/mL) | 10.0  (0.7 – 24.2) | 0.7  (0.1 – 3.0) | 1.8  (0.2 – 9.9) | 0.3  (0 – 1.9) | 5.0  (1.7 – 10.1) | 0.4  (0 – 2.3) |
| Total cell counts (cell/mL) | 1.7e+06  (1.3e+05 – 3.8e+06) | 2.4e+05  (6.1e+04 – 1.3e+06) | 4.8e+05  (1.7e+05 – 1.2e+06) | 1.6e+05  (9.4e+04 – 3.2e+05) | 7.2e+05  (4.2e+05 – 1.2e+06) | 1.1e+05  (4.5e+04 – 2.6e+05) |
| Intact cell counts (cell/mL) | 5.2e+05  (8.0e+03 – 1.1e+06) | 4.8e+04  (7.6e+02 – 4.5e+05) | 9.1e+04  (1.7e+04 – 4.2e+05) | 2.2e+04  (3.4e+03 – 9.1e+04) | 2.4e+05  (1.5e+05 – 4.4e+05) | 2.7e+04  (4.1e+03 – 1.1e+05) |
| Viability ratio (%) | 32  (6 – 54) | 13  (1 – 33) | 18  (6 – 35) | 11  (4 – 29) | 35  (17 – 48) | 21  (9 – 50) |
| ATP/ICC  (pg ATP/cell) | 6.8e-05  (2.9e-06 – 1.1e-03) | 3.2e-05  (7.2e-07 – 6.6e-05) | 2.3e-05  (3.2e-06 – 7.3e-05) | 1.1e-05  (1.4e-06 – 3.6e-05) | 2.1e-05  (7.9e-06 – 4.4e-05) | 1.3e-05  (3.1e-06 – 5.3e-05) |
| ATP/TCC  (p ATP/cell) | 8.5e-06  (5.3e-07 – 6.7e-05) | 2.9e-06  (2.4e-07 – 8.4e-06) | 4.4e-06  (3.4e-07 – 1.3e-05) | 1.3e-06  (2.1e-07 – 8.7e-06) | 7.2e-06  (2.1e-06 – 1.4e-05) | 3.2e-06  (2.8e-07 – 1.9e-05) |
| Culture-based *L.pneumophila* (MPN/L) | 4 487  (5 – 30 000) | 1 622  (5 – 22 726) | 100  (5 – 723) | 23  (5 – 264) | 2 368  (5 – 30 000) | 450  (5 – 3 971) |
| qPCR *L.pneumophila*  (gu/L) | 63 822  (10 – 1 160 000) | 3 461  (10 – 17 200) | 6 839  (10 – 54 800) | 686  (10 – 2 730) | 47 007  (132 – 808 000) | 3 158  (169 – 18 200) |

Table S. Mean per exposure risk values for both Legionellosis health outcomes (Pontiac fever and Legionnaires’ disease – LD) in conventional (> 13 lpm) and low-flow (< 7 lpm) showerheads.

| **Health outcome** | **Shower type** | **16-week building closure** | | **24 h after recommissioning** | | **4-week after recommissioning** | |
| --- | --- | --- | --- | --- | --- | --- | --- |
| First draw | 5-min flush | First draw | 5-min flush | First draw | 5-min flush |
| Pontiac fever endpoint with a *per exposure risk* | > 13 lpm | 1.4 X 10-2 | 4.1 X 10-3 | 2.7 X 10-4 | 7.3 X 10-5 | 6.2 X 10-3 | 1.3 X 10-3 |
| < 7 lpm | 2.6 X 10-3 | 7.8 X 10-4 | 5.3 X 10-5 | 1.4 X 10-5 | 1.2 X 10-3 | 2.7 X 10-4 |
| LD endpoint with a *per exposure risk* | > 13 lpm | 1.4 X 10-5 | 4.7 X 10-6 | 2.9 X 10-7 | 7.5 X 10-8 | 6.6 X 10-6 | 1.4 X 10-6 |
| < 7 lpm | 2.6 X 10-6 | 8.8 X 10-7 | 5.7 X 10-8 | 1.5 X 10-8 | 1.3 X 10-6 | 2.8 X 10-7 |
| LD endpoint with a *per exposure DALY* | > 13 lpm | 1.3 X 10-5 | 4.5 X 10-6 | 2.8 X 10-7 | 7.3 X 10-8 | 6.4 X 10-6 | 1.4 X 10-6 |
| < 7 lpm | 2.6 X 10-6 | 8.6 X 10-7 | 5.5 X 10-8 | 1.4 X 10-8 | 1.2 X 10-6 | 2.7 X 10-7 |
